# Supplementary material for: Author Correction: Tracking historical changes in perceived trustworthiness in Western Europe using machine learning analyses of facial cues in paintings
Source: PubMed Central journal article supplement (PMC9474442; doi:10.1038/s41467-022-31843-x), 2022-09-14
Supplement: 41467_2022_31843_MOESM2_ESM.pdf [file 41467_2022_31843_MOESM2_ESM.pdf]

1  
2  
3  
4  
5  
6  
7  
8  
9  
10  
11  
12  
13  
14  
15  
16  
17  
18  
19  
20  
21  
22  
23  
24

## Supplementary Information

**Tracking historical changes in perceived trustworthiness in Western Europe using machine learning analyses of facial cues in paintings.**

Correspondence to:

Nicolas Baumard ([nicolas.baumard@ens.fr](mailto:nicolas.baumard@ens.fr)) & Lou Safra ([lou.safra@sciencespo.fr](mailto:lou.safra@sciencespo.fr))

**This PDF file includes:**

- Supplementary Methods
- Supplementary Figures. 1 to 8
- Supplementary Tables 1 to 4

## 25 Supplementary Methods

26

27 In order to quantify perceived trustworthiness displays in historical paintings, we developed an  
28 algorithm automatically estimating perceived trustworthiness from faces. Our algorithm also  
29 extracted perceived dominance since perceived dominance has been shown to be, together with  
30 perceived trustworthiness, one of the main dimensions of social perception <sup>1</sup>. Crucially, although  
31 dominance displays carry signals of power that are distinct from the cooperation-related signals  
32 associated with trustworthiness displays, perceived dominance and perceived trustworthiness are  
33 correlated <sup>1</sup>. This correlation entails that it is of paramount importance to control for perceived  
34 dominance when analyzing perceived trustworthiness. This type of analysis, studying together  
35 distinct but related social signals, has already been shown to be particularly promising in the  
36 emotion domain by revealing the importance of taking into account the existence of compound  
37 emotions <sup>2</sup>.

38

### 39 Construction and validation of an algorithm for modeling perceived trustworthiness and 40 perceived dominance evaluations

41

42 We built a model that automatically extracts evaluations of perceived trustworthiness and  
43 perceived dominance from the all the facial action units detected by the OpenFace algorithm (i.e.,  
44 both dichotomous and continuous estimations; OpenFace version 1.01 using OpenCV 3.3.0 <sup>3</sup>). To  
45 do so, we extracted the facial action units of five sets of avatars previously generated with Facegen  
46 and controlled for perceived dominance, for perceived trustworthiness or for both (Supplementary  
47 Figure 1) <sup>4</sup>. Each avatar is generated from an initial face and manipulated to either express a  
48 specific level of perceived dominance, perceived trustworthiness or both based on the model  
49 developed by Oosterhof & Todorov <sup>1</sup>. These avatar faces have been shown to successfully elicit  
50 ratings of perceived dominance and perceived trustworthiness in participants <sup>4-6</sup>. Thus, compared  
51 to participants' ratings on photographs that may be sensitive to the participants characteristics and  
52 to experimental protocol factors (such as the type of scale used to give the ratings), using avatars  
53 allow us to have well-validated sets of faces to train our model. These sets of avatars correspond  
54 to all the existing and available validated avatars controlled for perceived trustworthiness or  
55 perceived dominance and generated by Facegen.

56

57 More precisely, one set of avatars was generated from one single face and manipulated for both  
58 perceived dominance and perceived trustworthiness ( $N = 49$ ; 7 levels of perceived dominance and  
59 7 levels of perceived trustworthiness, each of the 7 levels corresponds to a standard deviation in  
60 Oosterhof and Todorov's <sup>1</sup> model ranging between -3 to +3 SD; set 1). Two other sets of faces  
61 correspond to 25 maximally distinct faces manipulated either on perceived trustworthiness only  
62 ( $N = 175$ ; 7 different levels of perceived trustworthiness; set 2) or perceived dominance only ( $N =$   
63  $175$ ; 7 different levels of perceived dominance; set 3). Finally, the two last sets are composed of  
64 25 Caucasian faces manipulated to present the same 7 levels of perceived trustworthiness ( $N =$   
65  $175$ ; set 4) or of perceived dominance ( $N = 175$ ; set 5). Thus, three sets of avatars were used to  
66 build the model automatically extracting perceived trustworthiness levels (sets 1, 2 and 4) and  
67 three were used to build the model automatically extracting perceived dominance levels (sets 1, 3  
68 and 5).

69

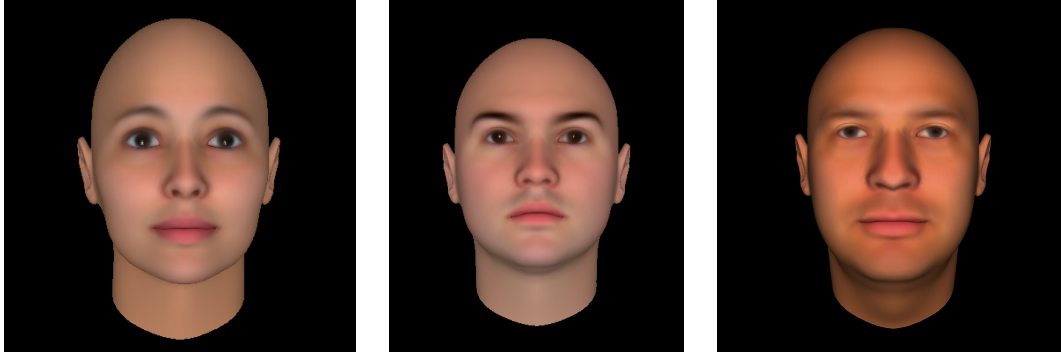

70  
 71 **Supplementary Figure 1** Sample of the avatar faces used for the algorithm optimization. **Left.** Face for the set of  
 72 avatars controlled for perceived dominance and perceived trustworthiness; **Middle.** Example of a face for one of the  
 73 sets of avatars controlled for perceived dominance only and one of the sets controlled for perceived trustworthiness  
 74 only; **Right.** Example of a face of the ‘Maximally distinct faces’ for the other set of avatar controlled for perceived  
 75 dominance only and for the other set of avatars controlled for perceived trustworthiness only. These three images were  
 76 created by Prof. Alexander Todorov’s team and is shared under [license](#) CC BY.

77  
 78 Because all our avatars were generated using the same models for perceived trustworthiness and  
 79 perceived dominance, actions units with a variance inferior to 0.01 were discarded as not  
 80 informative enough regarding cues of perceived trustworthiness and perceived dominance. The  
 81 reason was that they were either too low in frequency or too low in intensity (ten action units  
 82 discarded over thirty-three in both the perceived trustworthiness and perceived dominance avatar  
 83 sets).  
 84

|                                  | SVM linear  | SVM radial       | Random forest | Linear model |
|----------------------------------|-------------|------------------|---------------|--------------|
| Hyperparameters                  | Cost (C)    | Cost (C) & sigma | mtry          | $\emptyset$  |
| <u>Perceived trustworthiness</u> |             |                  |               |              |
| Mean absolute error              | 0.88 ± 0.02 | 0.87 ± 0.02      | 0.82 ± 0.01   | 0.87 ± 0.01  |
| Root mean squared deviation      | 1.10 ± 0.02 | 1.05 ± 0.02      | 0.99 ± 0.01   | 1.06 ± 0.02  |
| R squared                        | 0.71 ± 0.01 | 0.74 ± 0.01      | 0.78 ± 0.01   | 0.72 ± 0.01  |
| <u>Perceived dominance</u>       |             |                  |               |              |
| Mean absolute error              | 0.92 ± 0.02 | 0.79 ± 0.02      | 0.80 ± 0.01   | 0.90 ± 0.02  |
| Root mean squared deviation      | 1.14 ± 0.02 | 0.99 ± 0.02      | 0.98 ± 0.02   | 1.11 ± 0.02  |
| R squared                        | 0.68 ± 0.01 | 0.76 ± 0.01      | 0.77 ± 0.01   | 0.70 ± 0.01  |

85 **Supplementary Table 1.** Model selection for extracting evaluations of perceived trustworthiness and perceived  
 86 dominance. Three indices of fit were computed, two which minimization indicates a better fit (mean absolute error  
 87 and root mean squared deviation) and one which maximization indicates a better fit (R squared). The random forest  
 88 was outperforming the linear model and the linear support vector model in the three indices of fit tested: mean  
 89 absolute error, root mean squared deviation and r-squared. The random forest model was better than the radial  
 90 support vector model for the perceived trustworthiness model and similar to the radials support vector model for the  
 91 perceived dominance model. Values are presented as mean ± standard error to the mean. Source data are provided  
 92 as raw data and scripts on the online depository.  
 93

94 Based on our validation results on the avatar faces, we then trained the perceived trustworthiness  
95 and perceived dominance models with the same hyperparameters on the entire avatar dataset in  
96 order to increase the accuracy of our estimates and tested this model on an independent set of  
97 photographs. This method differs from the classical train-test split used in machine learning which  
98 was not applicable given that each avatar of our dataset presented unique features in terms of  
99 luminance, texture and face shape which was important to increase the accuracy of our algorithms.  
100 However, our procedure is a highly conservative test of the validity of our models as the test set is  
101 completely different and independent of the training set. This conservative method for assessing  
102 the validity of the algorithms is particularly critical in the present study as our goal is to generalize  
103 the estimated perceived trustworthiness and perceived dominance evaluations to historical  
104 portraits, a completely different set of images than those classically used in social cognition  
105 research.  
106

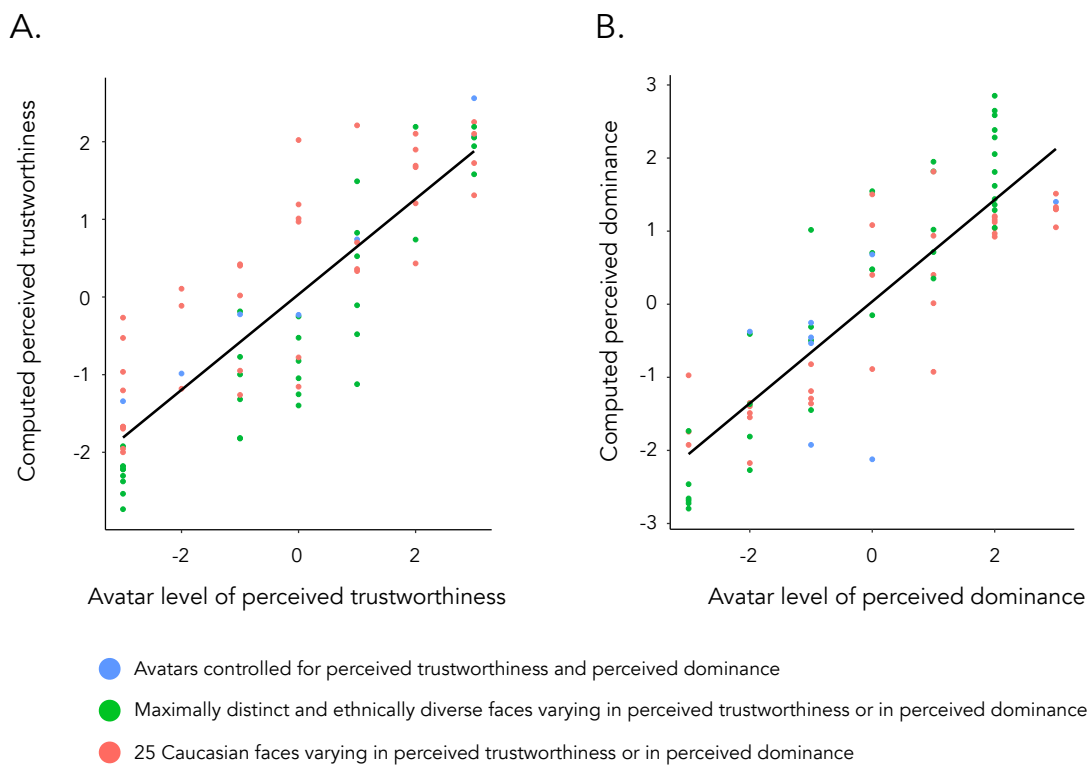

107  
108 **Supplementary Figure 2** Correlation between the avatars' actual level of perceived trustworthiness and perceived  
109 dominance in the test set and the computed perceived trustworthiness (A; Pearson correlation:  $r = .85, t(75) = 14.17,$   
110  $p < .001$ ) and perceived dominance (B; Pearson correlation:  $r = .86, t(75) = 14.72, p < .001$ ) based on the model  
111 optimized on the training set only. Source data are provided as raw data and scripts on the online depository.  
112

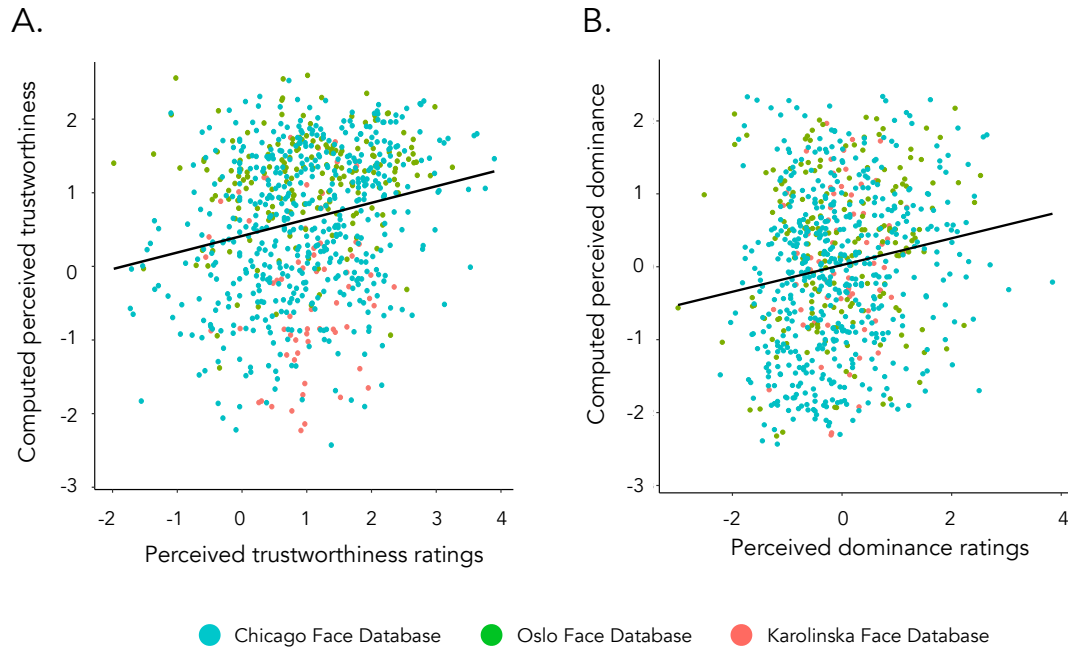

113  
 114  
 115  
 116  
 117  
 118  
 119  
 120

**Supplementary Figure 3** Correlation between participants' ratings of perceived trustworthiness and dominance displays in the three databases providing subjective ratings of perceived trustworthiness and perceived dominance (the Chicago Face Database, the Oslo Face Database and the Karolinska Face Database) and the retrieved perceived trustworthiness (A, Pearson correlation:  $r = .22$ ,  $t(768) = 6.19$ ,  $p < .001$ ) and retrieved perceived dominance (B, Pearson correlation:  $r = .16$ ,  $t(769) = 4.54$ ,  $p < .001$ ) levels estimated using the Facial Action Units detected by Open Face and our random-forest model. Source data are provided as raw data and scripts on the online depository.

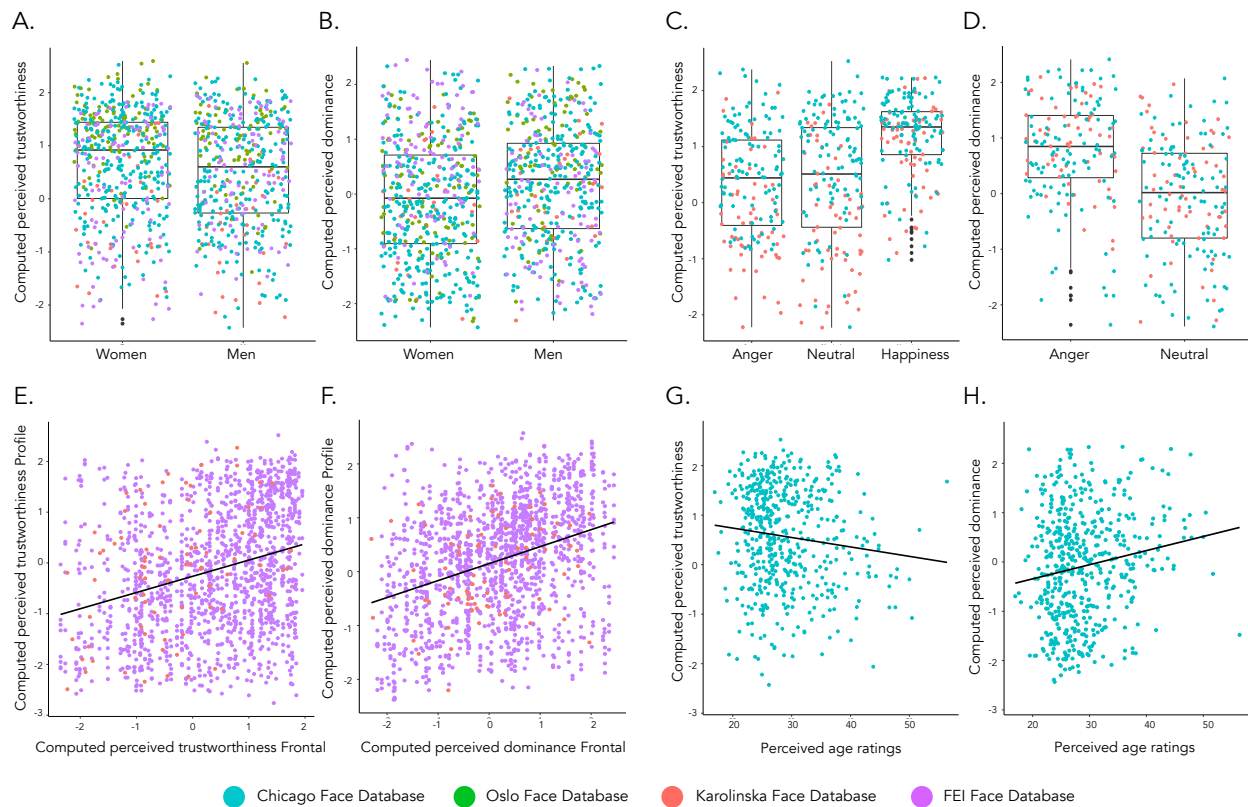

121  
 122 **Supplementary Figure 4** Recovery of classical effects of gender (A-B, Student t-test: perceived trustworthiness  
 123  $t(972) = 2.67, p = .008$ ; perceived dominance:  $t(972) = -3.63, p < .001$ , emotion (C-D, two-level linear regression:  
 124 perceived trustworthiness:  $t(167) = 10.64, p < .001$ ; perceived dominance:  $t(167) = 9.42, p < .001$ , head orientation  
 125 (E-F; Pearson correlations: perceived trustworthiness  $r = .29, t(1500) = 11.51, p < .001$ ; perceived dominance:  $r = 0.34,$   
 126  $t(1500) = 13.79, p < .001$ ) and age (G-H, Pearson correlations: perceived trustworthiness:  $r = -.12, t(518) = -2.68, p =$   
 127  $.008$ ; perceived dominance:  $r = 0.16, t(518) = 3.70, p < .001$ ) in the perceived trustworthiness and perceived  
 128 dominance estimates computed using our random forest algorithm. In the boxplots (A-D), the centre line corresponds to the  
 129 median, the lower and upper bounds of the box to the 25th and 75th percentiles and the whiskers to the largest and  
 130 lowest values in a limit of 1.5 times the inter-quartile range from the box bounds. Source data are provided as raw data  
 131 and scripts on the online depository.

132  
 133

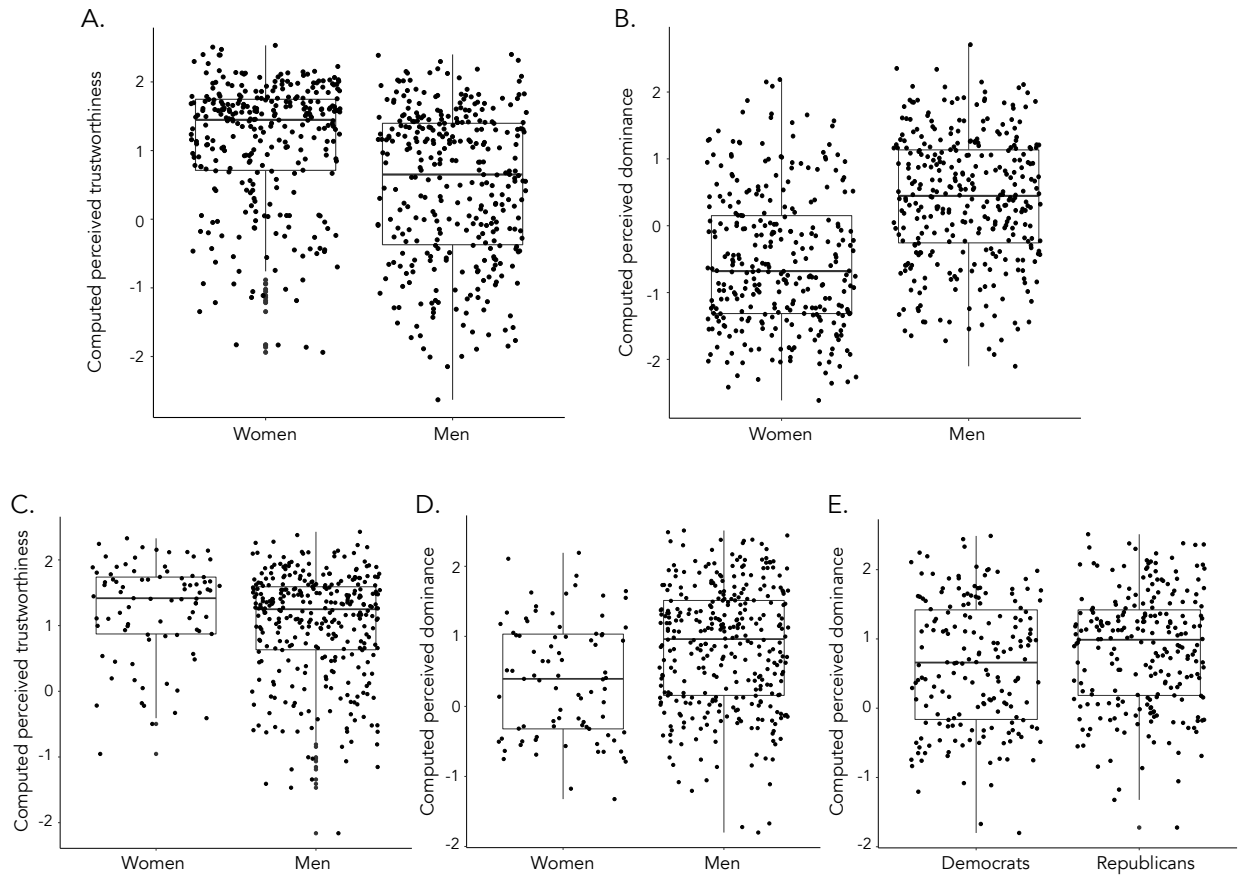

134  
 135  
 136  
 137  
 138  
 139  
 140  
 141  
 142  
 143

**Supplementary Figure 5 Results on natural images**

**A-B** Recovery of the classical effects of gender in Google Image portraits of ‘Women’ ( $N = 304$  images) and ‘Men’ ( $N = 330$  images); **C-E** Recovery of the classical gender (**C-D**) and party (**E**) effects on the portraits of the House of the Representatives (women :  $N = 85$  images ; men :  $N = 334$  images ; democrats :  $N = 182$  images ; republicans :  $N = 237$  images). The centre line corresponds to the median, the lower and upper bounds of the box to the 25th and 75th percentiles and the whiskers to the largest and lowest values in a limit of 1.5 times the inter-quartile range from the box bounds. Source data are provided as raw data and scripts on the online depository.

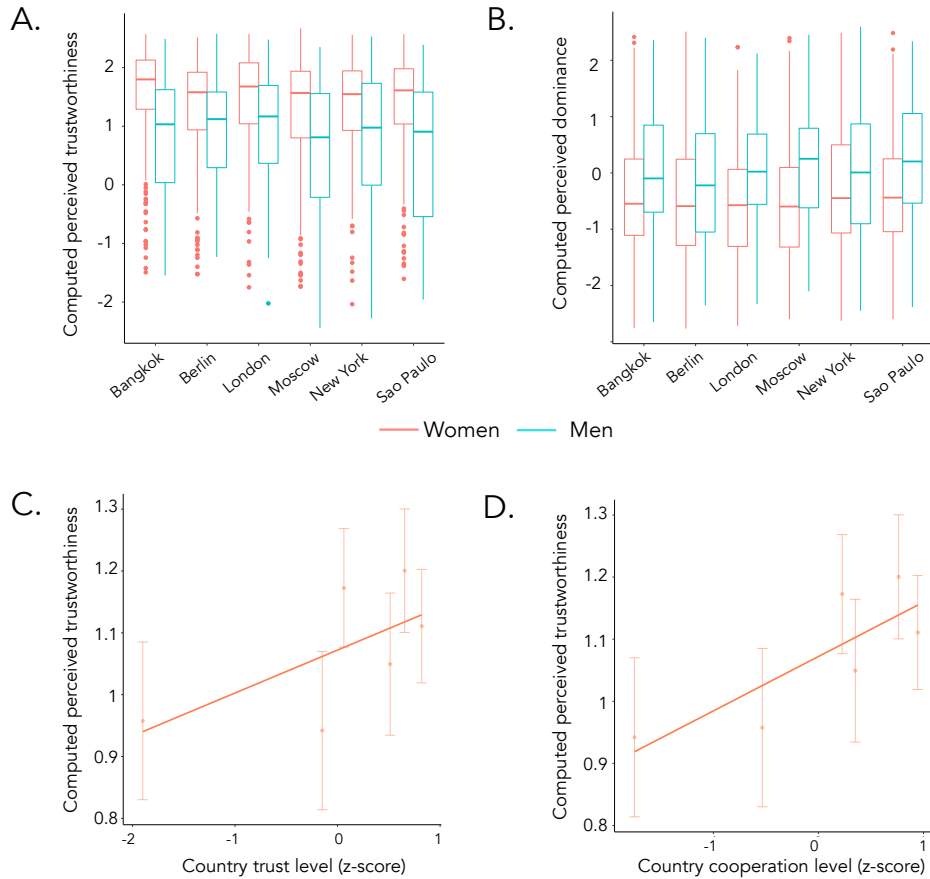

144  
145  
146  
147  
148  
149  
150  
151  
152  
153  
154  
155  
156  
157  
158  
159  
160  
161

**Supplementary Figure 6 Results on the Selficity Database**

**A-B** Recovery of the classical effects of gender (Bangkok :  $N = 247$  selfies of women,  $N = 169$  selfies of men ; Berlin :  $N = 239$  selfies of women,  $N = 163$  selfies of men ; London :  $N = 217$  selfies of women,  $N = 134$  selfies of men ; Moscow :  $N = 338$  selfies of women,  $N = 82$  selfies of men ; New York :  $N = 210$  selfies of women,  $N = 127$  selfies of men ; Sao Paulo :  $N = 231$  selfies of women,  $N = 120$  selfies of men). The centre line corresponds to the median, the lower and upper bounds of the box to the 25th and 75th percentiles and the whiskers to the largest and lowest values in a limit of 1.5 times the inter-quartile range from the box bounds.; **C-D** Significant association between the country's level of interpersonal trust (**C**) and cooperation (**D**) and the mean perceived trustworthiness estimated on the pictures of the Selficity database averaged between portraits of women and men, the red line corresponds to the effect computed in the regression controlling for the gender of the sitters (interpersonal trust:  $b = 0.81 \pm 0.23, z = 3.50, p < .001$ ; cooperation:  $b = 0.13 \pm 0.03, z = 3.67, p < .001$ ). Data are represented as mean values and error bars correspond to standard errors to the mean (Bangkok :  $N = 416$  selfies ; Berlin :  $N = 402$  selfies ; London :  $N = 351$  selfies ; Moscow :  $N = 420$  selfies ; New York :  $N = 337$  selfies ; Sao Paulo :  $N = 351$  selfies). Source data are provided as raw data and scripts on the online depository.

Analysis of the National Portrait Gallery and the Web Gallery of Art

| Text                                             | Code                              | Example                                 |
|--------------------------------------------------|-----------------------------------|-----------------------------------------|
| Century                                          | Century + 50                      | 16 <sup>th</sup> century = 1550         |
| Late century                                     | Centruy + 90                      | Late 16 <sup>th</sup> century = 1590    |
| Early century                                    | Century + 10                      | Early 16 <sup>th</sup> century = 1510   |
| Half of century                                  | Century + 50                      | Half of 16 <sup>th</sup> century = 1550 |
| Decade+s                                         | Decade                            | 1650s = 1655                            |
| Around/about/perhaps/probably/circa/after + Date | Date                              | Circa 1655 = 1655                       |
| Date 1 – Date 2                                  | Rounded mean of Date 1 and Date 2 | 1650-1655 = 1652                        |



162 **Supplementary Table 2** – Coding of the date of the portraits

163

164 The information about the sitters’ gender and age allowed us to replicate the classic findings that  
 165 older sitters appear more dominant and less trustworthy than younger sitters and that female sitters  
 166 appear more trustworthy and less dominant than male sitters (perceived trustworthiness: gender  
 167 effect:  $t(1960) = 9.69, p < .001$ ; age effect:  $t(1960) = -6.63, p < .001$ ; perceived dominance: gender  
 168 effect:  $t(1960) = 7.24, p < .001$ ; age effect:  $t(1960) = -9.12, p < .001$ ; Supplementary Figure 7). As  
 169 for the NPG, we accurately recovered the gender effect on perceived trustworthiness and d  
 170 perceived dominance on the portraits of the Web Gallery of Art (perceived trustworthiness:  $z =$   
 171  $17.70, p < .001$ ; perceived dominance:  $z = -13.35, p < .001$ ; Supplementary Figure 8).  
 172

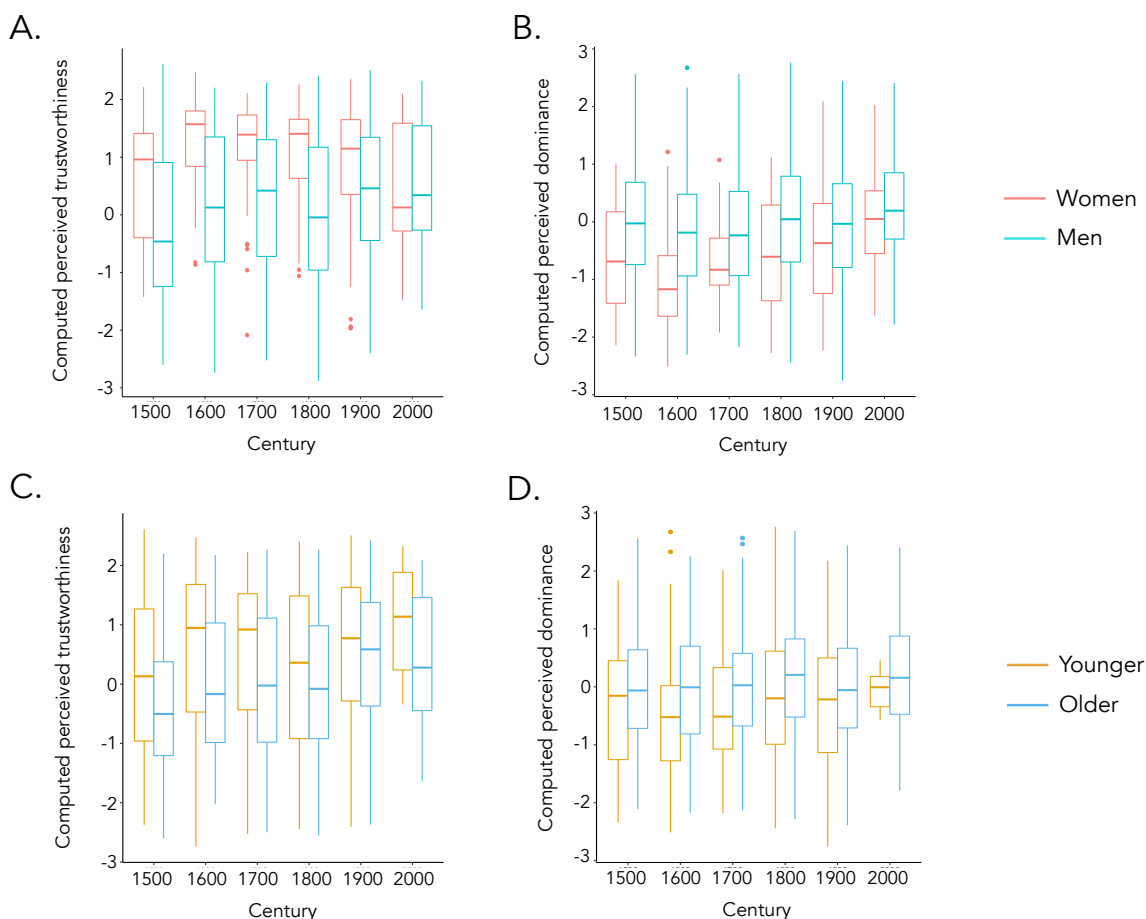

173

174 **Supplementary Figure 7** Recovery of the gender (A-B) (1500 :  $N = 23$  portraits of women,  $N = 68$  portraits of men ;  
 175 1600 :  $N = 50$  portraits of women,  $N = 236$  portraits of men ; 1700 :  $N = 53$  portraits of women,  $N = 432$  portraits of  
 176 men ; 1800 :  $N = 44$  portraits of women,  $N = 609$  portraits of men ; 1900 :  $N = 98$  portraits of women,  $N = 351$  portraits  
 177 of men ; 2000 :  $N = 19$  portraits of women,  $N = 42$  portraits of men) and age (C-D) effects in the National Portrait  
 178 Gallery database over the centuries (the ‘Younger’ category is defined as sitters being under 48 year old; 1500 :  $N =$   
 179  $61$  portraits of younger sitters,  $N = 30$  portraits of older sitters; 1600 :  $N = 188$  portraits of younger sitters,  $N = 96$   
 180 portraits of younger sitters ; 1700 :  $N = 280$  portraits of younger sitters,  $N = 194$  portraits of older sitters; 1800 :  $N =$   
 181  $273$  portraits of younger sitters,  $N = 345$  portraits of older sitters; 1900 :  $N = 187$  portraits of younger sitters,  $N = 249$   
 182 portraits of older sitters; 2000 :  $N = 8$  portraits of younger sitters,  $N = 53$  portraits of older sitters). The centre line  
 183 corresponds to the median, the lower and upper bounds of the box to the 25th and 75th percentiles and the whiskers  
 184 to the largest and lowest values in a limit of 1.5 times the inter-quartile range from the box bounds. Source data are  
 185 provided as raw data and scripts on the online depository.

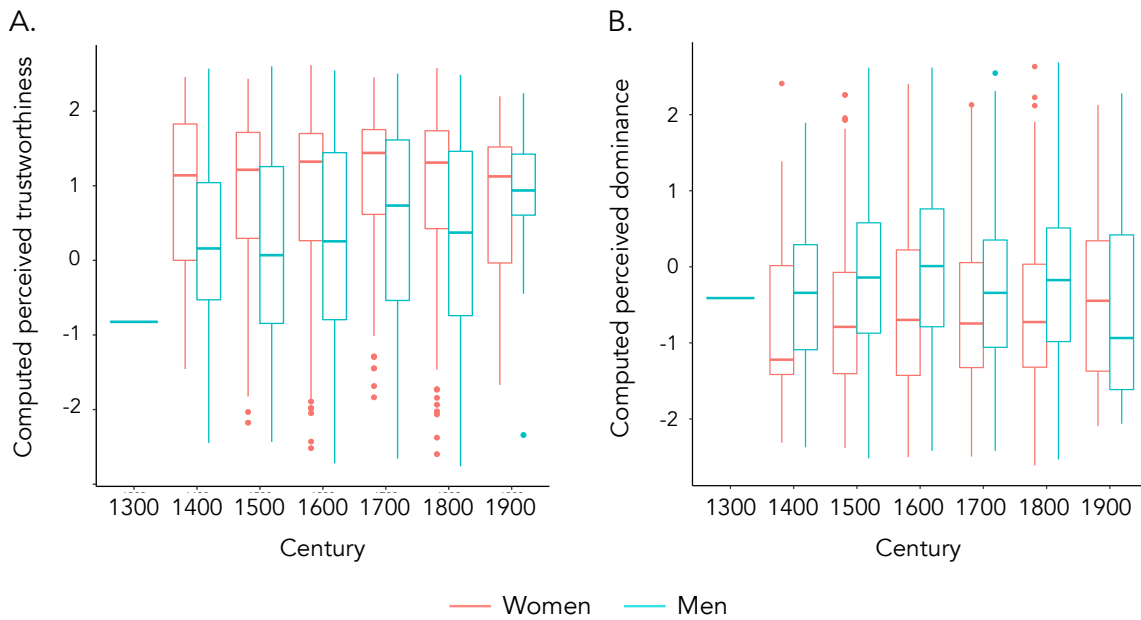

186  
 187  
 188  
 189  
 190  
 191  
 192  
 193  
 194  
 195

**Supplementary Figure 8** Recovery of the gender effects in the Web Gallery of Art (1300 :  $N = 1$  portrait of man ; 1400 :  $N = 137$  portraits of men,  $N = 41$  portraits of women ; 1500 :  $N = 696$  portraits of men,  $N = 291$  portraits of women ; 1600 :  $N = 963$  portraits of men,  $N = 509$  portraits of women ; 1700 :  $N = 418$  portraits of men,  $N = 350$  portraits of women ; 1800 :  $N = 349$  portraits of men,  $N = 307$  portraits of women ; 1900 :  $N = 22$  portraits of men,  $N = 22$  portraits of women) for perceived trustworthiness (**A**) and perceived dominance (**B**). The centre line corresponds to the median, the lower and upper bounds of the box to the 25th and 75th percentiles and the whiskers to the largest and lowest values in a limit of 1.5 times the inter-quartile range from the box bounds. Source data are provided as raw data and scripts on the online depository.

| Dependent variable               | <u>Perceived</u> Trustworthiness                    |                                                       | GDP per capita                                        | Democratization                                       |
|----------------------------------|-----------------------------------------------------|-------------------------------------------------------|-------------------------------------------------------|-------------------------------------------------------|
| Independent variable of interest | GDP per capita                                      | Democratization                                       | <u>Perceived</u> Trustworthiness                      | <u>Perceived</u> Trustworthiness                      |
| Delay Two decades                |                                                     |                                                       |                                                       |                                                       |
| Model comparison                 | $F(40,1) = 12.38$<br>$p = .001$                     | $F(15,1) = 0.11$<br>$p > .250$                        | $F(41,1) = 0.76$<br>$p > .250$                        | $F(16,1) = 6.54$<br>$p = .022$                        |
| Effect                           | $b = 0.04 \pm 0.01$<br>$t(40) = 3.52$<br>$p = .001$ | $b = -0.01 \pm 0.03$<br>$t(14) = -0.33$<br>$p > .250$ | $b = 0.59 \pm 0.68$<br>$t(41) = 0.87$<br>$p > .250$   | $b = -5.82 \pm 2.27$<br>$t(15) = -2.56$<br>$p = .022$ |
| Delay One decade                 |                                                     |                                                       |                                                       |                                                       |
| Model comparison                 | $F(41,1) = 11.40$<br>$p = .002$                     | $F(16,1) = 1.11$<br>$p > .250$                        | $F(42,1) = 0.01$<br>$p > .250$                        | $F(17,1) = 5.26$<br>$p = .036$                        |
| Effect                           | $b = 0.03 \pm 0.01$<br>$t(40) = 3.38$<br>$p = .002$ | $b = -0.02 \pm 0.02$<br>$t(15) = -1.05$<br>$p > .250$ | $b = -0.05 \pm 0.66$<br>$t(41) = -0.08$<br>$p > .250$ | $b = -4.19 \pm 1.82$<br>$t(16) = 0.64$<br>$p > .250$  |

**Supplementary Table 3** Temporal dynamics of perceived trustworthiness, GDP per capita and democratization in the paintings of the National Portrait Gallery. Model comparison corresponds to the comparison of the model that included the delayed variable of interest with the model in which this variable was excluded. Effect corresponds to

196  
 197  
 198

199 the estimation of the regression coefficient of the delayed variable of interest. All the tests are two-sided. Following  
 200 APA's recommendations, exact p-values are provided for p-s between .001 and .250. Source data are provided as raw  
 201 data and scripts on the online depository.  
 202

| Dependent variable               | Perceived Trustworthiness               |                                           | GDP per capita                            | Democratization                         |
|----------------------------------|-----------------------------------------|-------------------------------------------|-------------------------------------------|-----------------------------------------|
| Independent variable of interest | GDP per capita                          | Democratization                           | Perceived Trustworthiness                 | Perceived Trustworthiness               |
| Delay One decade                 |                                         |                                           |                                           |                                         |
| Model comparison                 | X(1) = 4.00<br>p = .046                 | X(1) = 0.01<br>p > .250                   | X(1) = 2.48<br>p = .115                   | X(1) = 0.65<br>p > .250                 |
| Effect                           | b = 0.12 ± 0.05<br>z = 2.61<br>p = .009 | b = 0.00 ± 0.01<br>z = -0.11<br>p > .250  | b = -0.03 ± 0.02<br>z = -1.56<br>p = .119 | b = 0.38 ± 0.49<br>z = 0.78<br>p > .250 |
| Delay Two decades                |                                         |                                           |                                           |                                         |
| Model comparison                 | X(1) = 6.42<br>p = .011                 | X(1) = 0.81<br>P > .250                   | X(1) = 2.02<br>p = .155                   | X(1) = 0.72<br>p > .250                 |
| Effect                           | b = 0.19 ± 0.06<br>z = 3.48<br>p < .001 | b = -0.01 ± 0.01<br>z = -0.84<br>p > .250 | b = -0.05 ± 0.04<br>z = -1.42<br>p = .157 | b = 0.45 ± 0.55<br>z = 0.82<br>p > .250 |

203 **Supplementary Table 4** Temporal dynamics of perceived trustworthiness, GDP per capita and democratization in  
 204 the paintings of the Web Gallery of Art. All the tests are two-sided. Following APA's recommendations, exact p-  
 205 values are provided for p-values between .001 and .250. Source data are provided as raw data and scripts on the  
 206 online depository.  
 207  
 208  
 209

|                                  | Affluence only                     |                                    | Time + Affluence                   |                                    | Armed conflict only                |                                    | Time + Armed conflict             |                                    |
|----------------------------------|------------------------------------|------------------------------------|------------------------------------|------------------------------------|------------------------------------|------------------------------------|-----------------------------------|------------------------------------|
|                                  | National Portraits Gallery         | Web Gallery of Art                 | National Portraits Gallery         | Web Gallery of Art                 | National Portraits Gallery         | Web Gallery of Art                 | National Portraits Gallery        | Web Gallery of Art                 |
| year                             |                                    |                                    | .11±.02<br>z = 5.46<br>p < .001    | .05±.01<br>z = 3.54<br>p < .001    |                                    |                                    | .14±.02<br>z = 7.55<br>p < .001   | .05±.01<br>z = 4.13<br>p < .001    |
| Number of book titles per capita | .35±.06<br>z = 6.15<br>p < .001    | .29±.10<br>z = 2.77<br>p = .006    | .21±.06<br>z = 3.45<br>p = .001    | .14±.11<br>z = 1.26<br>p = .208    |                                    |                                    |                                   |                                    |
| Presence of an armed conflict    |                                    |                                    |                                    |                                    | .01±.05<br>z = 0.30<br>p > .250    | .00±.03<br>z = -0.01<br>p > .250   | .05±.05<br>z = 1.05<br>p > .250   | -.01±.03<br>z = -0.39<br>p > .250  |
| Control variables                |                                    |                                    |                                    |                                    |                                    |                                    |                                   |                                    |
| Perceived dominance              | -.78±.02<br>z = -40.10<br>p < .001 | -.75±.02<br>z = -54.29<br>p < .001 | -.79±.02<br>z = -40.85<br>p < .001 | -.74±.01<br>z = -54.13<br>p < .001 | -.78±.02<br>z = -39.79<br>p < .001 | -.74±.01<br>z = -54.85<br>p < .001 | -.79±.02 z=-40.74<br>p < .001     | -.74±.02 z=-54.86<br>p < .001      |
| Gender                           | -.31±.06<br>z = -5.27<br>p < .001  | -.33±.03<br>z = -11.13<br>p < .001 | -.29±.06<br>z = -5.09<br>p < .001  | -.32±.03<br>z = -10.52<br>p < .001 | -.37±.06<br>z = -6.41<br>p < .001  | -.33±.03<br>z = -11.51<br>p < .001 | -.33±.06<br>z = -5.68<br>p < .001 | -.31±.03<br>z = -10.49<br>p < .001 |

|        |                                          |      |                                          |      |                                        |      |                                          |      |
|--------|------------------------------------------|------|------------------------------------------|------|----------------------------------------|------|------------------------------------------|------|
| Age    | <b>-.00±.00</b><br>z = -1.35<br>p = .178 |      | <b>-.00±.00</b><br>z = -2.49<br>p = .013 |      | <b>.00±.00</b><br>z = 0.21<br>p > .250 |      | <b>-.00±.00</b><br>z = -2.01<br>p = .044 |      |
| Sample |                                          |      |                                          |      |                                        |      |                                          |      |
| N      | 1962                                     | 3801 | 1962                                     | 3801 | 1962                                   | 3927 | 1962                                     | 3927 |

**Supplementary Table 5** Replication analyses on **perceived trustworthiness in the National Portrait Gallery and the Web Gallery of Art using the Number of book titles per capital as a proxy of affluence as well as the presence of armed conflict as indicator of periods of war and social unrest.**

The first line corresponds to the regression coefficient with their associated standard error to the mean (mean ± s.e.m.). Results in bold corresponds to statistically significant effects of the variables of interest. The upper part of the table presents the effects of the variables of interest (time, affluence and democratization), while the lower part presents the effects of the control variables (perceived dominance, gender and age). All the tests are two-sided. Following APA's recommendations, exact p-values are provided for p-values between .001 and .250. Source data are provided as raw data and scripts on the online depository.

### Copyright of the analysed databases

All the exploited databases (Prof. Todorov's avatar datasets, Karolinska database, Oslo Face database, Chicago Face database, FEI Face database, the National Portrait Gallery database and the Web Gallery of Art database) are free of use for non-commercial research purposes. The use of the Selfiecity database has been authorized by its owner, Dr. Lev Manovuch.

### Supplementary References

- Oosterhof, N. N. & Todorov, A. The functional basis of face evaluation. *Proc. Natl. Acad. Sci.* **105**, 11087–11092 (2008).
- Du, S., Tao, Y. & Martinez, A. M. Compound facial expressions of emotion. *Proc. Natl. Acad. Sci.* **111**, E1454–E1462 (2014).
- Baltrušaitis, T., Robinson, P. & Morency, L. OpenFace: An open source facial behavior analysis toolkit. in *2016 IEEE Winter Conference on Applications of Computer Vision (WACV)* 1–10 (2016). doi:10.1109/WACV.2016.7477553.
- Todorov, A., Dotsch, R., Porter, J. M., Oosterhof, N. N. & Falvello, V. B. Validation of data-driven computational models of social perception of faces. *Emotion* **13**, 724–738 (2013).
- Stewart, L. H. *et al.* Unconscious evaluation of faces on social dimensions. *J. Exp. Psychol. Gen.* **141**, 715–727 (2012).
- Safra, L., Ioannou, C., Amsellem, F., Delorme, R. & Chevallier, C. Distinct effects of social motivation on face evaluations in adolescents with and without autism. *Sci. Rep.* **8**, 1–8 (2018).
